# Supplementary material for: Evaluation of Dietary Quality Based on Intelligent Ordering System and Chinese Healthy Eating Index in College Students from a Medical School in Shanghai, China
Source: Nutrients. 2022 Feb 27;14(5):1012. doi: 10.3390/nu14051012 (PMC8912503; doi:10.3390/nu14051012)
Supplement: Supplementary file 1 [file nutrients-14-01012-s001.zip › nutrients-1566830-supplementary.pdf]

## Supplemental Materials:

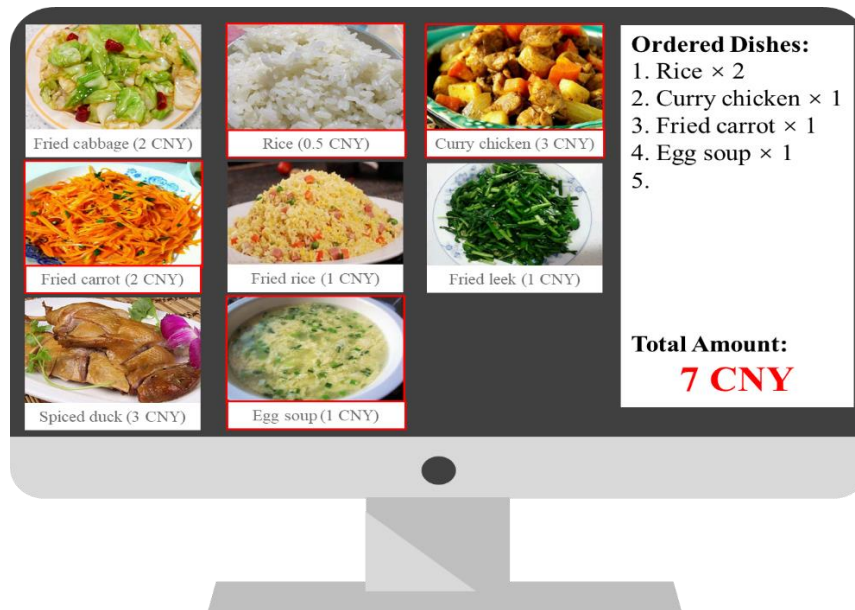

**Figure S1. Introduction of “Intelligent Ordering System”**

**Table S1 Factor analysis for Nutrition Literacy Assessment Questionnaire**

|                                                                                                   | Factor loadings |              |              |
|---------------------------------------------------------------------------------------------------|-----------------|--------------|--------------|
|                                                                                                   | 1               | 2            | 3            |
| I am vulnerable to nutritional dietary advice on new media (wechat, Weibo)                        | <b>0.828</b>    | -0.049       | 0.031        |
| If I discuss food with others, I often refer to the information in the media                      | <b>0.779</b>    | -0.086       | 0.007        |
| I mainly learn nutrition and diet knowledge from new media (wechat and weibo)                     | <b>0.713</b>    | -0.079       | 0.028        |
| I believe in the various dietary suggestions I read in the media                                  | <b>0.697</b>    | 0.257        | -0.154       |
| I think the dietary guidelines are easy to understand                                             | 0.024           | <b>0.800</b> | 0.070        |
| I understand the concept of “balanced diet”                                                       | 0.128           | <b>0.739</b> | -0.014       |
| I can understand the information on food labels (nutrients and energy, etc.)                      | 0.074           | <b>0.730</b> | 0.115        |
| When I read about nutrition and diet, I don’t need someone to help me understand it               | -0.190          | <b>0.705</b> | -0.119       |
| I found the nutritionist's statement easy to understand                                           | -0.169          | <b>0.680</b> | -0.085       |
| I understand the core items and standards in the dietary guidelines                               | 0.106           | <b>0.633</b> | 0.090        |
| I refer to the label information on the food package (nutrients, energy, etc.) when choosing food | 0.001           | 0.055        | <b>0.811</b> |
| I can choose food according to my own nutritional status (such as fat free, less sugar, etc.)     | -0.046          | 0.067        | <b>0.795</b> |
| I'm willing to spend extra time or money on healthy meals                                         | -0.023          | -0.067       | <b>0.763</b> |
| Eigen value                                                                                       | 2.604           | 3.495        | 1.407        |
| Variance explained (%)                                                                            | 20.028          | 26.883       | 10.822       |
| Cumulative sums of squares (%)                                                                    | 46.911          | 26.883       | 57.733       |
